# Supplementary material
Source: Springer Nature journal article supplement (https://www.springermedizin.de/resource/supplementary/13223_2011_308_MOESM4_ESM.pdf/9597526)

**1****2****3****4****5****6****7**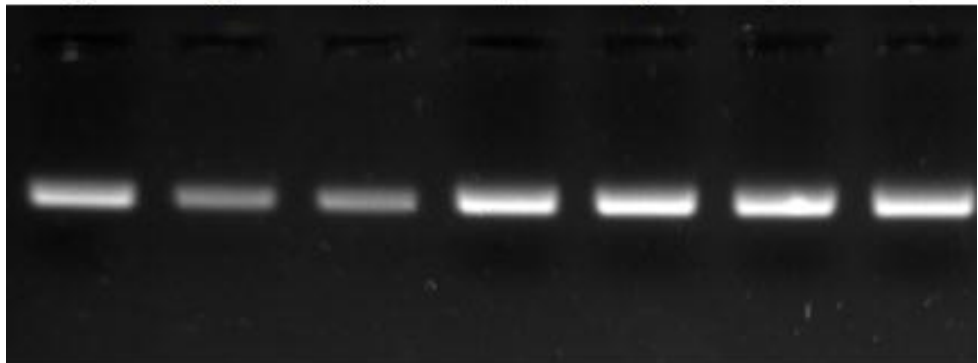

Supplement: MOESM4 [file 9597526]
